# Supplementary material for: Long-Term Body Mass Index Variability and Adverse Cardiovascular Outcomes
Source: PubMed Central journal article supplement (PMC10958234; doi:10.1001/jamanetworkopen.2024.3062), 2024-03-21
Supplement: jamanetwopen-e243062-s001.pdf [file jamanetwopen-e243062-s001.pdf]

## Supplemental Online Content

Almuwaqqat Z, Hui Q, Liu C, et al. Long-term body mass index variability and adverse cardiovascular outcomes. *JAMA Netw Open*. 2024;7(3):e243062.  
doi:10.1001/jamanetworkopen.2024.3062

**eTable 1.** UK Biobank Cohort Characteristics

**eTable 2.** Unadjusted Associations Between Body Mass Index Variability and Adverse Cardiovascular Events

**eTable 3.** Associations Between Body Mass Index Variability and Adverse Cardiovascular Events From the UK Biobank

**eTable 4.** Sex-Specific Associations Between Body Mass Index Variability and Adverse Cardiovascular Events From the UK Biobank

**eAppendix.** VA Million Veteran Program: Core Acknowledgment for Publications

This supplemental material has been provided by the authors to give readers additional information about their work.

**Supplemental eTable 1. UK Biobank Cohort Characteristics White (N= 65,047)**

| <b>Variable</b>                           | <b>Participants No. (%)</b> |
|-------------------------------------------|-----------------------------|
| <b>N (%)</b>                              | 65,047                      |
| <b>Age, mean (SD)</b>                     | 57.30 (7.77)                |
| <b>Male, N, %</b>                         | 26,982 (41.5)               |
| <b>BMI, mean (SD)</b>                     | 26.83 (4.60)                |
| <b>Diabetes, N, %</b>                     | 3,919 (6.0)                 |
| <b>Smoking history, N, %</b>              | 28,621 (44.0)               |
| <b>HDL, mean (SD)</b>                     | 56.49 (14.72)               |
| <b>SBP, mean (SD)</b>                     | 141.38 (19.69)              |
| <b>Hypertension meds, N, %</b>            | 15373 (23.6)                |
| <b>Total Cholesterol, mean (SD)</b>       | 222.06 (43.85)              |
| <b>Statins, N, %</b>                      | 11517 (17.7)                |
| <b>eGFR, mean (SD)</b>                    | 94.20 (12.79)               |
| <b>BMI, CV, SD</b>                        | 0.06 (0.04)                 |
| <b>N of BMI measurements, median, IQR</b> | 4 (3-6)                     |
| <b>Stroke, N, %</b>                       | 1,767 (2.7)                 |
| <b>MI, N, %</b>                           | 5,136 (7.9)                 |
| <b>CV Death, N, %</b>                     | 1,405 (2.2)                 |
| <b>MACE, N, %</b>                         | 6,934 (10.7)                |

Abbreviations: BMI, body mass index; CAD, coronary artery disease; IQR, interquartile range; MACE, major adverse cardiac events; SD, standard deviation; CV, coefficient of variation; SBP, systolic blood pressure; HDL, high density lipoprotein.

**Supplemental eTable 2. Unadjusted associations between body mass index (BMI) variability and adverse cardiovascular events.**

| <b>Harmonized<br/>Ancestry and<br/>Race/Ethnicity</b> | <b>HR (95%CI) *</b> | <b>P</b> |
|-------------------------------------------------------|---------------------|----------|
| <b>NHW</b>                                            | 0.99 (0.94-1.04)    | 0.69     |
| <b>NHB</b>                                            | 1.08 (1.00-1.16)    | 0.04     |
| <b>HIS</b>                                            | 1.12 (0.98-1.28)    | 0.10     |

Abbreviation: HIS, Hispanic; HR, hazard ratio; NHB, Non-Hispanic Black; NHW, non-Hispanic White; 95%CI, 95% confidence interval \*Per 1 standard deviation of BMI variability

**Supplemental eTable 3. Associations Between Body Mass index (BMI) Variability and Adverse Cardiovascular Events from the UK Biobank**

| <b>Outcome</b>               | <b>HR (95%CI) *</b> | <b>P</b> |
|------------------------------|---------------------|----------|
| <b>Model 1</b>               |                     |          |
| <b>Incident CAD</b>          | 1.02 (0.99-1.04)    | 0.20     |
| <b>Acute Ischemic Stroke</b> | 1.01 (0.97-1.06)    | 0.53     |
| <b>Cardiovascular Death</b>  | 1.08 (1.04-1.11)    | <0.001   |
| <b>MACE</b>                  | 1.02 (0.995-1.04)   | 0.13     |
| <b>Model 2</b>               |                     |          |
| <b>Incident CAD</b>          | 1.02 (0.99-1.04)    | 0.20     |
| <b>Acute Ischemic Stroke</b> | 1.01 (0.97-1.06)    | 0.95     |
| <b>Cardiovascular Death</b>  | 1.08 (1.04-1.11)    | <0.001   |
| <b>MACE</b>                  | 1.02 (0.995-1.04)   | 0.12     |
| <b>Model 3</b>               |                     |          |
| <b>Incident CAD</b>          | 1.02 (0.99-1.05)    | 0.15     |
| <b>Acute Ischemic Stroke</b> | 1.00 (0.96-1.06)    | 0.87     |
| <b>Cardiovascular Death</b>  | 1.08 (1.04-1.13)    | <0.001   |
| <b>MACE</b>                  | 1.02 (0.99-1.04)    | 0.14     |

Abbreviation: HR, hazard ratio; 95%CI, 95% confidence interval; CAD, coronary artery disease; MACE, major adverse cardiac events.

\*Per 1 standard deviation of BMI variability

Model 1 adjusted for age, sex, mean BMI, diabetes, smoking history, high-density lipoprotein, hypertension, total cholesterol level and estimated glomerular filtration rate.

Model 2= model 1 adjusted for BMI PRS

Model 3= model 1 adjusted for physical activity

**Supplemental eTable 4. Sex-Specific Associations Between Body Mass index (BMI) Variability and Adverse Cardiovascular Events from the UK Biobank**

| <b>Outcome</b>               | <b>HR (95%CI) *</b> | <b>P</b> |
|------------------------------|---------------------|----------|
| <b>Male</b>                  |                     |          |
| <b>Incident CAD</b>          | 1.01 (0.99-1.04)    | 0.43     |
| <b>Acute Ischemic Stroke</b> | 1.04 (0.99-1.10)    | 0.12     |
| <b>Cardiovascular Death</b>  | 1.07 (1.02-1.12)    | 0.002    |
| <b>MACE</b>                  | 1.02 (0.99-1.05)    | 0.14     |
| <b>Female</b>                |                     |          |
| <b>Incident CAD</b>          | 1.03 (0.99-1.07)    | 0.19     |
| <b>Acute Ischemic Stroke</b> | 0.99 (0.92-1.06)    | 0.69     |
| <b>Cardiovascular Death</b>  | 1.10 (1.03-1.11)    | 0.002    |
| <b>MACE</b>                  | 1.02 (0.98-1.05)    | 0.41     |

Abbreviation: HR, hazard ratio; 95%CI, 95% confidence interval; CAD, coronary artery disease; MACE, major adverse cardiac events.

\*Per 1 standard deviation of BMI variability

Model adjusted for age, sex, mean BMI, diabetes, smoking history, high-density lipoprotein, hypertension, total cholesterol level and estimated glomerular filtration rate.

eAppendix. VA Million Veteran Program: Core Acknowledgment for Publications, February 2023. **MVP Program Office:** Sumitra Muralidhar, Ph.D., Program Director, US Department of Veterans Affairs, 810 Vermont Avenue NW, Washington, DC 20420; Jennifer Moser, Ph.D., Associate Director, Scientific Programs US Department of Veterans Affairs, 810 Vermont Avenue NW, Washington, DC 20420; Jennifer E. Deen, B.S., Associate Director, Cohort & Public Relations US Department of Veterans Affairs, 810 Vermont Avenue NW, Washington, DC 20420. **MVP Executive Committee:** Co-Chair: Philip S. Tsao, Ph.D, VA Palo Alto Health Care System, 3801 Miranda Avenue, Palo Alto, CA 94304; Co-Chair: Sumitra Muralidhar, Ph.D., US Department of Veterans Affairs, 810 Vermont Avenue NW, Washington, DC 20420; J. Michael Gaziano, MD, M.P.H., VA Boston Healthcare System, 150 S. Huntington Avenue, Boston, MA 02130; Elizabeth Hauser, Ph.D., Durham VA Medical Center, 508 Fulton Street, Durham, NC 27705; Amy Kilbourne, Ph.D., M.P.H., VA HSR&D, 2215 Fuller Road, Ann Arbor, MI 48105; Shiuh-Wen Luoh, MD, Ph.D., VA Portland Health Care System, 3710 SW US Veterans Hospital Rd, Portland, OR 97239; Michael Matheny, MD, M.S., M.P.H., VA Tennessee Valley Healthcare System, 1310 24th Ave. South, Nashville, TN 37212; Dave Oslin, MD, Philadelphia VA Medical Center, 3900 Woodland Avenue, Philadelphia, PA 19104. **MVP Co-Principal Investigators:** J. Michael Gaziano, MD, M.P.H., VA Boston Healthcare System, 150 S. Huntington Avenue, Boston, MA 02130; Philip S. Tsao, Ph.D., VA Palo Alto Health Care System, 3801 Miranda Avenue, Palo Alto, CA 94304. **MVP Core Operations:** Lori Churby, B.S., Director, MVP Regulatory Affairs, VA Palo Alto Health Care System, 3801 Miranda Avenue, Palo Alto, CA 94304; Stacey B. Whitbourne, Ph.D., Director, MVP Cohort Management VA Boston Healthcare System, 150 S. Huntington Avenue, Boston, MA 02130; Jessica V. Brewer, M.P.H., Director, MVP Recruitment & Enrollment VA Boston Healthcare System, 150 S. Huntington Avenue, Boston, MA 02130; Shahpoor (Alex) Shayan, M.S., Director, MVP Recruitment and Enrollment Informatics, VA Boston Healthcare System, 150 S. Huntington Avenue, Boston, MA 02130; Luis E. Selva, Ph.D., Executive Director, MVP Biorepositories VA Boston Healthcare System, 150 S. Huntington Avenue, Boston, MA 02130; Saiju Pyarajan Ph.D., Director, Data and Computational Sciences VA Boston Healthcare System, 150 S. Huntington Avenue, Boston, MA 02130; Kelly Cho, M.P.H, Ph.D., Director, MVP Phenomics Data Core VA Boston Healthcare System, 150 S. Huntington Avenue, Boston, MA 02130; Scott L. DuVall, Ph.D., Director, VA Informatics and Computing Infrastructure (VINCI), VA Salt Lake City Health Care System, 500 Foothill Drive, Salt Lake City, UT 84148; Mary T. Brophy MD, M.P.H., Director, VA Central Biorepository VA Boston Healthcare System, 150 S. Huntington Avenue, Boston, MA 02130. **MVP Coordinating Centers:** MVP Coordinating Center, Boston - J. Michael Gaziano, MD, M.P.H., VA Boston Healthcare System, 150 S. Huntington Avenue, Boston, MA 02130; MVP Coordinating Center, Palo Alto – Philip S. Tsao, Ph.D., VA Palo Alto Health Care System, 3801 Miranda Avenue, Palo Alto, CA 94304. **MVP Information Center,** Canandaigua – Brady Stephens, M.S., Canandaigua VA Medical Center, 400 Fort Hill Avenue, Canandaigua, NY 14424. Cooperative Studies Program Clinical Research Pharmacy Coordinating Center, Albuquerque – Todd Connor, Pharm.D.; Dean P. Argyres, B.S., M.S., New Mexico VA Health Care System, 1501 San Pedro Drive SE, Albuquerque, NM 87108. **MVP Publications and Presentations Committee:** Co-Chair: Tim Assimes, MD, VA Palo Alto Health Care System, 3801 Miranda Avenue, Palo Alto, CA 94304; Co-Chair: Adriana Hung, MD, VA Tennessee Valley Healthcare System, 1310 24th Ave. South, Nashville, TN 37212; Co-Chair: Henry Kranzler, MD, Philadelphia VA Medical Center, 3900 Woodland Avenue, Philadelphia, PA 19104. **MVP Local Site Investigators:** Samuel Aguayo, MD,

Phoenix VA Health Care System, 650 E. Indian School Road, Phoenix, AZ 85012; Sunil Ahuja, MD, South Texas Veterans Health Care System, 7400 Merton Minter Boulevard, San Antonio, TX 78229; Kathrina Alexander, MD, Veterans Health Care System of the Ozarks, 1100 North College Avenue, Fayetteville, AR 72703; Xiao M. Androulakis, MD, Columbia VA Health Care System, 6439 Garners Ferry Road, Columbia, SC 29209; Prakash Balasubramanian, MD, William S. Middleton Memorial Veterans Hospital, 2500 Overlook Terrace, Madison, WI 53705; Zuhair Ballas, MD, Iowa City VA Health Care System, 601 Highway 6 West, Iowa City, IA 52246-2208; Jean Beckham, Ph.D., Durham VA Medical Center, 508 Fulton Street, Durham, NC 27705; Sujata Bhushan, MD, VA North Texas Health Care System, 4500 S. Lancaster Road, Dallas, TX 75216; Edward Boyko, MD, VA Puget Sound Health Care System, 1660 S. Columbian Way, Seattle, WA 98108-1597; David Cohen, MD, Portland VA Medical Center, 3710 SW U.S. Veterans Hospital Road, Portland, OR 97239; Louis Dellitalia, MD, Birmingham VA Medical Center, 700 S. 19th Street, Birmingham AL 35233; L. Christine Faulk, MD, Robert J. Dole VA Medical Center, 5500 East Kellogg Drive, Wichita, KS 67218-1607; Joseph Fayad, MD, VA Southern Nevada Healthcare System, 6900 North Pecos Road, North Las Vegas, NV 89086; Daryl Fujii, Ph.D., VA Pacific Islands Health Care System, 459 Patterson Rd, Honolulu, HI 96819; Saib Gappy, MD, John D. Dingell VA Medical Center, 4646 John R Street, Detroit, MI 48201; Frank Gesek, Ph.D., White River Junction VA Medical Center, 163 Veterans Drive, White River Junction, VT 05009; Jennifer Greco, MD, Sioux Falls VA Health Care System, 2501 W 22nd Street, Sioux Falls, SD 57105; Michael Godschalk, MD, Richmond VA Medical Center, 1201 Broad Rock Blvd., Richmond, VA 23249; Todd W. Gress, MD, Ph.D., Hershel “Woody” Williams VA Medical Center, 1540 Spring Valley Drive, Huntington, WV 25704; Samir Gupta, MD, M.S.C.S., VA San Diego Healthcare System, 3350 La Jolla Village Drive, San Diego, CA 92161; Salvador Gutierrez, MD, Edward Hines, Jr. VA Medical Center, 5000 South 5th Avenue, Hines, IL 60141; John Harley, MD, Ph.D., Cincinnati VA Medical Center, 3200 Vine Street, Cincinnati, OH 45220; Kimberly Hammer, Ph.D., Fargo VA Health Care System, 2101 N. Elm, Fargo, ND 58102; Mark Hamner, MD, Ralph H. Johnson VA Medical Center 109 Bee Street, Mental Health Research, Charleston, SC 29401; Adriana Hung, MD, M.P.H., VA Tennessee Valley Healthcare System, 1310 24th Avenue, South Nashville, TN 37212; Robin Hurley, MD, W.G. (Bill) Hefner VA Medical Center, 1601 Brenner Ave, Salisbury, NC 28144; Pran Iruvanti, D.O., Ph.D., Hampton VA Medical Center, 100 Emancipation Drive, Hampton, VA 23667; Frank Jacono, MD, VA Northeast Ohio Healthcare System, 10701 East Boulevard, Cleveland, OH 44106; Darshana Jhala, MD, Philadelphia VA Medical Center, 3900 Woodland Avenue, Philadelphia, PA 19104; Scott Kinlay, M.B.B.S., Ph.D., VA Boston Healthcare System, 150 S. Huntington Avenue, Boston, MA 02130; Jon Klein, MD, Ph.D., Louisville VA Medical Center, 800 Zorn Avenue, Louisville, KY 40206; Michael Landry, Ph.D., Southeast Louisiana Veterans Health Care System, 2400 Canal Street, New Orleans, LA 70119; Peter Liang, MD, M.P.H., VA New York Harbor Healthcare System, 423 East 23rd Street, New York, NY 10010; Suthat Liangpunsakul, MD, M.P.H., Richard Roudebush VA Medical Center, 1481 West 10th Street, Indianapolis, IN 46202; Jack Lichy, MD, Ph.D., Washington DC VA Medical Center, 50 Irving St, Washington, D. C. 20422; C. Scott Mahan, MD, Charles George VA Medical Center, 1100 Tunnel Road, Asheville, NC 28805; Ronnie Marrache, MD, VA Maine Healthcare System, 1 VA Center, Augusta, ME 04330; Stephen Mastorides, MD, James A. Haley Veterans’ Hospital, 13000 Bruce B. Downs Blvd, Tampa, FL 33612; Elisabeth Mates MD, Ph.D., VA Sierra Nevada Health Care System, 975 Kirman Avenue, Reno, NV 89502; Kristin Mattocks, Ph.D., M.P.H., Central Western

Massachusetts Healthcare System, 421 North Main Street, Leeds, MA 01053; Paul Meyer, MD, Ph.D., Southern Arizona VA Health Care System, 3601 S 6th Avenue, Tucson, AZ 85723; Jonathan Moorman, MD, Ph.D., James H. Quillen VA Medical Center Corner of Lamont & Veterans Way, Mountain Home, TN 37684; Timothy Morgan, MD, VA Long Beach Healthcare System, 5901 East 7th Street Long Beach, CA 90822; Maureen Murdoch, MD, M.P.H., Minneapolis VA Health Care System, One Veterans Drive, Minneapolis, MN 55417; James Norton, Ph.D., VA Health Care Upstate New York, 113 Holland Avenue, Albany, NY 12208; Olaoluwa Okusaga, MD, Michael E. DeBakey VA Medical Center, 2002 Holcombe Blvd, Houston, TX 77030; Kris Ann Oursler, MD, Salem VA Medical Center, 1970 Roanoke Blvd, Salem, VA 24153; Ana Palacio, MD, M.P.H., Miami VA Health Care System, 1201 NW 16th Street, 11 GRC, Miami FL 33125; Samuel Poon, MD, Manchester VA Medical Center, 718 Smyth Road, Manchester, NH 03104; Emily Potter, Pharm.D., VA Eastern Kansas Health Care System, 4101 S 4th Street Trafficway, Leavenworth, KS 66048; Michael Rauchman, MD, St. Louis VA Health Care System, 915 North Grand Blvd, St. Louis, MO 63106; Richard Servatius, Ph.D., Syracuse VA Medical Center, 800 Irving Avenue, Syracuse, NY 13210; Satish Sharma, MD, Providence VA Medical Center, 830 Chalkstone Avenue, Providence, RI 02908; River Smith, Ph.D., Eastern Oklahoma VA Health Care System, 1011 Honor Heights Drive, Muskogee, OK 74401; Peruvemba Sriram, MD, N. FL/S. GA Veterans Health System, 1601 SW Archer Road, Gainesville, FL 32608; Patrick Strollo, Jr., MD, VA Pittsburgh Health Care System, University Drive, Pittsburgh, PA 15240; Neeraj Tandon, MD, Overton Brooks VA Medical Center, 510 East Stoner Ave, Shreveport, LA 71101; Philip Tsao, Ph.D., VA Palo Alto Health Care System, 3801 Miranda Avenue, Palo Alto, CA 94304-1290; Gerardo Villareal, MD, New Mexico VA Health Care System, 1501 San Pedro Drive, SE. Albuquerque, NM 87108; Agnes Wallbom, MD, M.S., VA Greater Los Angeles Health Care System, 11301 Wilshire Blvd, Los Angeles, CA 90073; Jessica Walsh, MD, VA Salt Lake City Health Care System, 500 Foothill Drive, Salt Lake City, UT 84148; John Wells, Ph.D., Edith Nourse Rogers Memorial Veterans Hospital, 200 Springs Road, Bedford, MA 01730; Jeffrey Whittle, MD, M.P.H., Clement J. Zablocki VA Medical Center, 5000 West National Avenue, Milwaukee, WI 53295; Mary Whooley, MD, San Francisco VA Health Care System, 4150 Clement Street, San Francisco, CA 94121; Allison E. Williams, N.D., Ph.D., R.N, Bay Pines VA Healthcare System, 10 000 Bay Pines Blvd Bay Pines, FL 33744; Peter Wilson, MD, Atlanta VA Medical Center, 1670 Clairmont Road, Decatur, GA 30033; Junzhe Xu, MD, VA Western New York Healthcare System, 3495 Bailey Avenue, Buffalo, NY 14215-1199; Shing Shing Yeh, Ph.D., MD, Northport VA Medical Center, 79 Middleville Road, Northport, NY 11768.
